# Supplementary material for: A model of chemotherapy-induced tumor dormancy: doxorubicin retention and degradation defines resumed growth in vivo
Source: Research Square preprint supplement (doi:10.21203/rs.3.rs-256128/v2), 2022-05-09
Supplement: Supplementary file 1 [file 2255d7ca6297b31a56004aa7.pdf]

Supplementary material to:

**A model of chemotherapy-induced tumor dormancy: doxorubicin retention and degradation defines resumed growth *in vivo*.** By Gintaras Zaleskis, Sima Garberytė, Božena Pavliukevičienė, Dainius Characiejus, Karolina Žilionytė, Jan Aleksander Kraško, Vitalijus Karabanovas, Nijolė Matusevičienė, Vakarė Barbora Kučinskaitė,, Vita Pašukonienė.

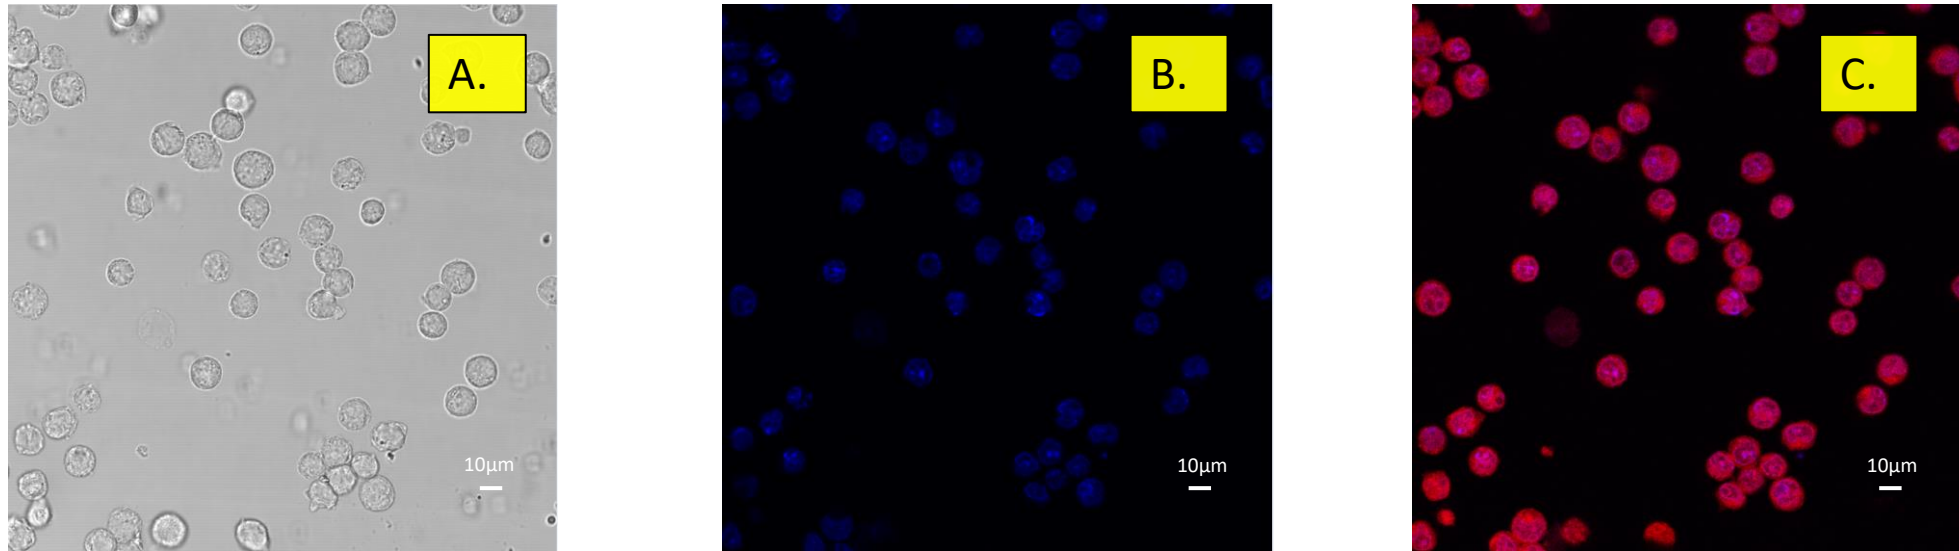

Supplemental Fig. 4. Morphological examination of SL2 cells prepared for *in vivo* implantation in tumor dormancy model. Cell morphology and viability was tested on coverslips before applying in TSDR model (A). Nuclear to cytoplasm ratio (NC) was calculated after nuclear staining with Hoechst 33342 (B) and doxorubicin uptake was verified (C) by direct visualization of samples. Part of the samples were injected without nuclear Hoechst 33342 counterstaining but loading verification was done immediately before ip injection into DBA2 mice. Cytoplasmic and nuclear uptake could be visualized sufficiently enough from Dox loaded samples.
