# Supplementary material for: A model of chemotherapy-induced tumor dormancy: doxorubicin retention and degradation defines resumed growth in vivo
Source: Research Square preprint supplement (doi:10.21203/rs.3.rs-256128/v2), 2022-05-09
Supplement: Supplementary file 1 [file fb6ede14548d16151c2fa674.docx]

| Specific aspect | SL2 cell line used in TSDR model |
| --- | --- |
| Origin, ploidy | Spontaneous lymphoma developed in DBA/2 mice, diploid |
| Morphology (May-Grunwald stained slides and confocal microscopy) | Rounded 10-12 µm in diameter, basophilic cytoplasm, moderately granular chromatin, N/C ratio = 0.69-0.74 |
| Growth characteristics *in vitro* and *in vivo* | Suspension *in vitro.* Ascites and solid tumor in DBA/2 or RAG2**-/-** mice |
| Immunophenotype | CD3**+**4**-**8a**+**44**+**45**+** |
| Mean survival time of DBA/2 mice with ascites tumor following i.p. implantation of 5x105 cells on day 0 | 18+2.1 days |
| Invasiveness, metastasis | Penetrating abdominal wall with subsequent ascites after s.c. implantation; metastatic deposits in serous cavities and lungs. |
| Sensitivity to dox (administered as a single i.v. 15mg/kg push) in ascites tumor of 5x104 cells implanted on day 0. | Cure if injected during first 24 h of implantation; growth retardation and recurrence if injected on days 2-7; no effect if injected on day 8 or later; |
| “Concomitant immunity” (solid tumor), host cell infiltration into tumor | Occurrence if two identical tumors are implanted two or more days apart |
| Granulo-monocytosis in blood (tumor bearing mice on day 7) | Granulocyte count > 2.8 fold increase  Monocyte count > 2.1. fold increase |

**Table 1. Characterization of SL2 lymphoma cells used in two step dormancy/recurrence (TSDR) model**.

| Parameter | Dox | Dox-dgr |
| --- | --- | --- |
| Fluorescence spectra in aqueous solutions (PBS diluted samples) | Three peaks at around 560, 594 and 638 nm | Three peaks at around 560, 594 and 638 nm |
| Fluorescence intensity in aqueous solutions (PBS diluted samples, fresh dox=1) | 1 | 0.003 |
| Fluorescence spectra in nucleus of viable or dead/apoptotic cells (confocal images, 488 nm excitation) | Two peaks at around 600 and 660 nm | Two peaks at around 600 and 660 nm |
| Fluorescence intensity in nucleus of viable cells (confocal images, 488 nm excitation, fresh dox=1) | 1 | 0.07 |
| Fluorescence intensity in nucleus of dead/apoptotic cells (confocal images, 488 nm excitation) | 1 | 0.2 |
| Ratio of nuclear/cytoplasmic fluorescence in viable SL2 cells (ROI area integral) | 19.0 : 1 | 2.1 : 1 |
| Absorbance spectra in aqueous solutions (PBS diluted samples). Dox-dgr ascribed in comparison to dox. | Typical one band at around 490 nm | Hypochromism between 415 and 540 nm, hyperchromism above 540 nm |
| HPLC analysis (internal standard – daunorubicin hydrochloride) | Retention time 11.1 min | Retention time 11.1 min., byproducts |
| Physical appearance (aqueous solution in original vial 2mg/ml). | Yellow-orange color | Dark red-brown color, sediment formation |
| Antiproliferative capacity as a WBC nadir in blood 48 hr following i.v. injection of 15 mg/kg | WBC decrease ≈3 fold | No effect- |
| Therapeutic efficacy in SL2 bearing mice (day 1 after 5x104 cell implantation) injected i.v. 15 mg/kg | Cure (> 60 days survival) | No effect |
| Growth and “recurrence” in TSDR model (10 µg/ml drug loading dose) | No | Yes, the same as control |

Table 2. Summary and comparison of doxorubicin and its modification - degraded dox used in TSDR model.
